# Supplementary material for: Übersetzung und Validierung einer deutschsprachigen Version des Sport Emotion Questionnaire (SEQ)
Source: Atypon-hosted journal article supplement (doi:10.1026/0012-1924/a000255), 2020-06-22
Supplement: 0012-1924_a000255_esm1.pdf [file 0012-1924_a000255_esm1.pdf]

**ESM1.** Ergebnisse der Skalenanalyse (in Cronbachs  $\alpha$ ) und der Itemanalyse (in  $r$ ) der beiden Untersuchungen der Sprachäquivalenz

| Items<br>(Stichprobe 1: n = 32)                                                    | Korrelation | Items<br>(Stichprobe2: n = 15)                                                     | Korrelation |
|------------------------------------------------------------------------------------|-------------|------------------------------------------------------------------------------------|-------------|
| <b>Anxiety / Ängstlichkeit (<math>\alpha = .77 / \alpha = .73</math>)</b>          |             | <b>Anxiety / Ängstlichkeit (<math>\alpha = .69 / \alpha = .80</math>)</b>          |             |
| Uneasy / unruhig                                                                   | .35*        | Uneasy / unruhig                                                                   | .66**       |
| Tense / angespannt                                                                 | .61**       | Tense / angespannt                                                                 | .67**       |
| Nervous / nervös                                                                   | .92**       | Nervous / nervös                                                                   | .73**       |
| Apprehensive / besorgt                                                             | .39*        | Apprehensive / besorgt                                                             | .70**       |
| Anxious / ängstlich                                                                | .59**       | Anxious / ängstlich                                                                | .78**       |
| <b>Dejection / Niedergeschlagenheit (<math>\alpha = .73 / \alpha = .73</math>)</b> |             | <b>Dejection / Niedergeschlagenheit (<math>\alpha = .70 / \alpha = .57</math>)</b> |             |
| Upset / verärgert                                                                  | .59**       | Upset / verärgert                                                                  | .67**       |
| Sad / traurig                                                                      | .55**       | Sad / traurig                                                                      | .68**       |
| Unhappy / unglücklich                                                              | .56**       | Unhappy / unglücklich                                                              | .78**       |
| Disappointed / enttäuscht                                                          | .88**       | Disappointed / enttäuscht                                                          | 1.00**      |
| Dejected / niedergeschlagen                                                        | .68**       | Dejected / niedergeschlagen                                                        | .58*        |
| <b>Excitement / Aufregung (<math>\alpha = .85 / \alpha = .18</math>)</b>           |             | <b>Excitement / Aufregung (<math>\alpha = .79 / \alpha = .70</math>)</b>           |             |
| Exhilarated / aufgekratzt                                                          | -.07        | Exhilarated / erregt                                                               | .60*        |
| Excited / aufgeregt                                                                | .40*        | Excited / aufgeregt                                                                | .64**       |
| Enthusiastic / enthusiastisch                                                      | .91**       | Enthusiastic / enthusiastisch                                                      | .78**       |
| Energetic / energiegeladen                                                         | .72**       | Energetic / energiegeladen                                                         | .77**       |
| <b>Anger / Ärger (<math>\alpha = .60 / \alpha = .81</math>)</b>                    |             | <b>Anger / Ärger (<math>\alpha = .45 / \alpha = .49</math>)</b>                    |             |
| Irritated / gereizt                                                                | .48**       | Irritated / gereizt                                                                | .74**       |
| Furious / zornig                                                                   | .44*        | Furious / zornig                                                                   | .68**       |
| Annoyed / genervt                                                                  | .50**       | Annoyed / genervt                                                                  | .66**       |
| Angry / wütend                                                                     | .50**       | Angry / wütend                                                                     | .68**       |
| <b>Happiness / Glück (<math>\alpha = .93 / \alpha = .92</math>)</b>                |             | <b>Happiness / Glück (<math>\alpha = .95 / \alpha = .91</math>)</b>                |             |
| Pleased / zufrieden                                                                | .82**       | Pleased / zufrieden                                                                | .82**       |
| Joyful / freudig                                                                   | .88**       | Joyful / freudig                                                                   | .94**       |
| Cheerful / heiter                                                                  | .64**       | Cheerful / heiter                                                                  | .87**       |
| Happy / glücklich                                                                  | .91**       | Happy / glücklich                                                                  | .91**       |

Anmerkungen: \*p < 0.05; \*\*p < 0.01.
