# Supplementary material for: Übersetzung und Validierung einer deutschsprachigen Version des Sport Emotion Questionnaire (SEQ)
Source: Atypon-hosted journal article supplement (doi:10.1026/0012-1924/a000255), 2020-06-22
Supplement: 0012-1924_a000255_esm3.pdf [file 0012-1924_a000255_esm3.pdf]

**ESM3.** Deskriptive Kennwerte der Studie 3: Mittelwerte (M), Streuung (SD), Trennschärfekoeffizienten ( $r_{it}$ ), Schiefe (S), Kurtosis (K), Faktorenloadungen aus der Hauptachsenanalyse mit anschließender obliquier Rotation und Kommunalität.

| Items<br>(n = 271)        | MW          | SD          | $r_{it}$ | S    | K     | $\lambda_1$                                         | $\lambda_2$ | $\lambda_3$ | $h^2$ |
|---------------------------|-------------|-------------|----------|------|-------|-----------------------------------------------------|-------------|-------------|-------|
| <b>Negative Emotionen</b> | <b>.32</b>  | <b>.57</b>  |          |      |       | <b><math>\alpha = .84</math> (m = .84; w = .84)</b> |             |             |       |
| Zornig                    | .26         | .68         | .67      | 2.93 | 8.50  | <b>.82</b>                                          | .16         | -.04        | .68   |
| Genervt                   | .52         | .95         | .56      | 1.93 | 3.22  | <b>.70</b>                                          | .09         | -.27        | .53   |
| Enttäuscht                | .22         | .62         | .71      | 3.20 | 10.18 | <b>.84</b>                                          | .17         | .02         | .72   |
| Wütend                    | .26         | .68         | .73      | 3.00 | 9.02  | <b>.85</b>                                          | .17         | -.04        | .73   |
| Niedergeschlagen          | .34         | .70         | .63      | 2.30 | 4.93  | <b>.75</b>                                          | .12         | -.13        | .57   |
| <b>Positive Emotionen</b> | <b>2.22</b> | <b>.89</b>  |          |      |       | <b><math>\alpha = .86</math> (m = .84; w = .90)</b> |             |             |       |
| Zufrieden                 | 2.23        | 1.05        | .69      | -.26 | -.48  | -.05                                                | -.18        | <b>.83</b>  | .70   |
| Freudig                   | 2.33        | 1.08        | .74      | -.41 | -.33  | -.19                                                | -.05        | <b>.87</b>  | .76   |
| Heiter                    | 1.99        | 1.08        | .64      | -.29 | -.49  | -.06                                                | .12         | <b>.79</b>  | .66   |
| Glücklich                 | 2.35        | 1.06        | .72      | -.49 | -.17  | -.06                                                | -.13        | <b>.85</b>  | .73   |
| <b>Anspannung</b>         | <b>1.66</b> | <b>1.01</b> |          |      |       | <b><math>\alpha = .87</math> (m = .87; w = .87)</b> |             |             |       |
| Unruhig                   | 1.39        | 1.17        | .67      | .44  | -.65  | .221                                                | <b>.81</b>  | -.15        | .66   |
| Aufgeregt                 | 1.97        | 1.23        | .70      | .07  | -.91  | .13                                                 | <b>.83</b>  | .06         | .71   |
| Nervös                    | 1.48        | 1.22        | .77      | .45  | -.76  | .15                                                 | <b>.88</b>  | -.08        | .78   |
| Angespannt                | 1.78        | 1.20        | .73      | -.02 | -.97  | .13                                                 | <b>.85</b>  | -.07        | .72   |

Anmerkungen:  $\lambda_1 - \lambda_3$  = Faktorloadungen nach Promax-Rotation (mit Kaiser-Normalisierung); die Hauptloadungen sind fett gedruckt;  $h^2$  = Kommunalität.
